# Supplementary material for: Efficient CAR T cell targeting of the CA125 extracellular repeat domain of MUC16
Source: PubMed Central journal article supplement — J Immunother Cancer. 2024 Apr 11;12(4):e008179. doi: 10.1136/jitc-2023-008179 (PMC11015285; doi:10.1136/jitc-2023-008179), 2024-04-11
Supplement: jitc-2023-008179supp009.pdf [file jitc-2023-008179supp009.pdf]

## Efficient CAR T cell targeting of the CA125 extracellular repeat domain of MUC16

Nicholas P. Casey<sup>1</sup>, Katrin Kleinmanns<sup>2, \*</sup>, Christopher Forcados<sup>1, \*</sup>, Pascal F. Gelebart<sup>2</sup>, Sandy Joaquina<sup>1</sup>, Martine Lode<sup>2</sup>, Emmanuelle Benard<sup>1</sup>, Fatemeh Kaveh<sup>1</sup>, Benjamin Caulier<sup>1,3,4</sup>, Christiane Helgestad Gjerde<sup>2,5</sup>, Elvira Garcia de Jalón<sup>2,6</sup>, David J. Warren<sup>5</sup>, Kristina Lindemann<sup>5,7</sup>, Erik Rokkones<sup>5</sup>, Ben Davidson<sup>7,8</sup>, Marit Renee Myhre<sup>1</sup>, Line Bjørge<sup>2,9</sup>, Emmet McCormack<sup>2, 10, 11</sup>, Else Marit Inderberg<sup>1</sup>, Sébastien Walchli<sup>1, \*</sup>

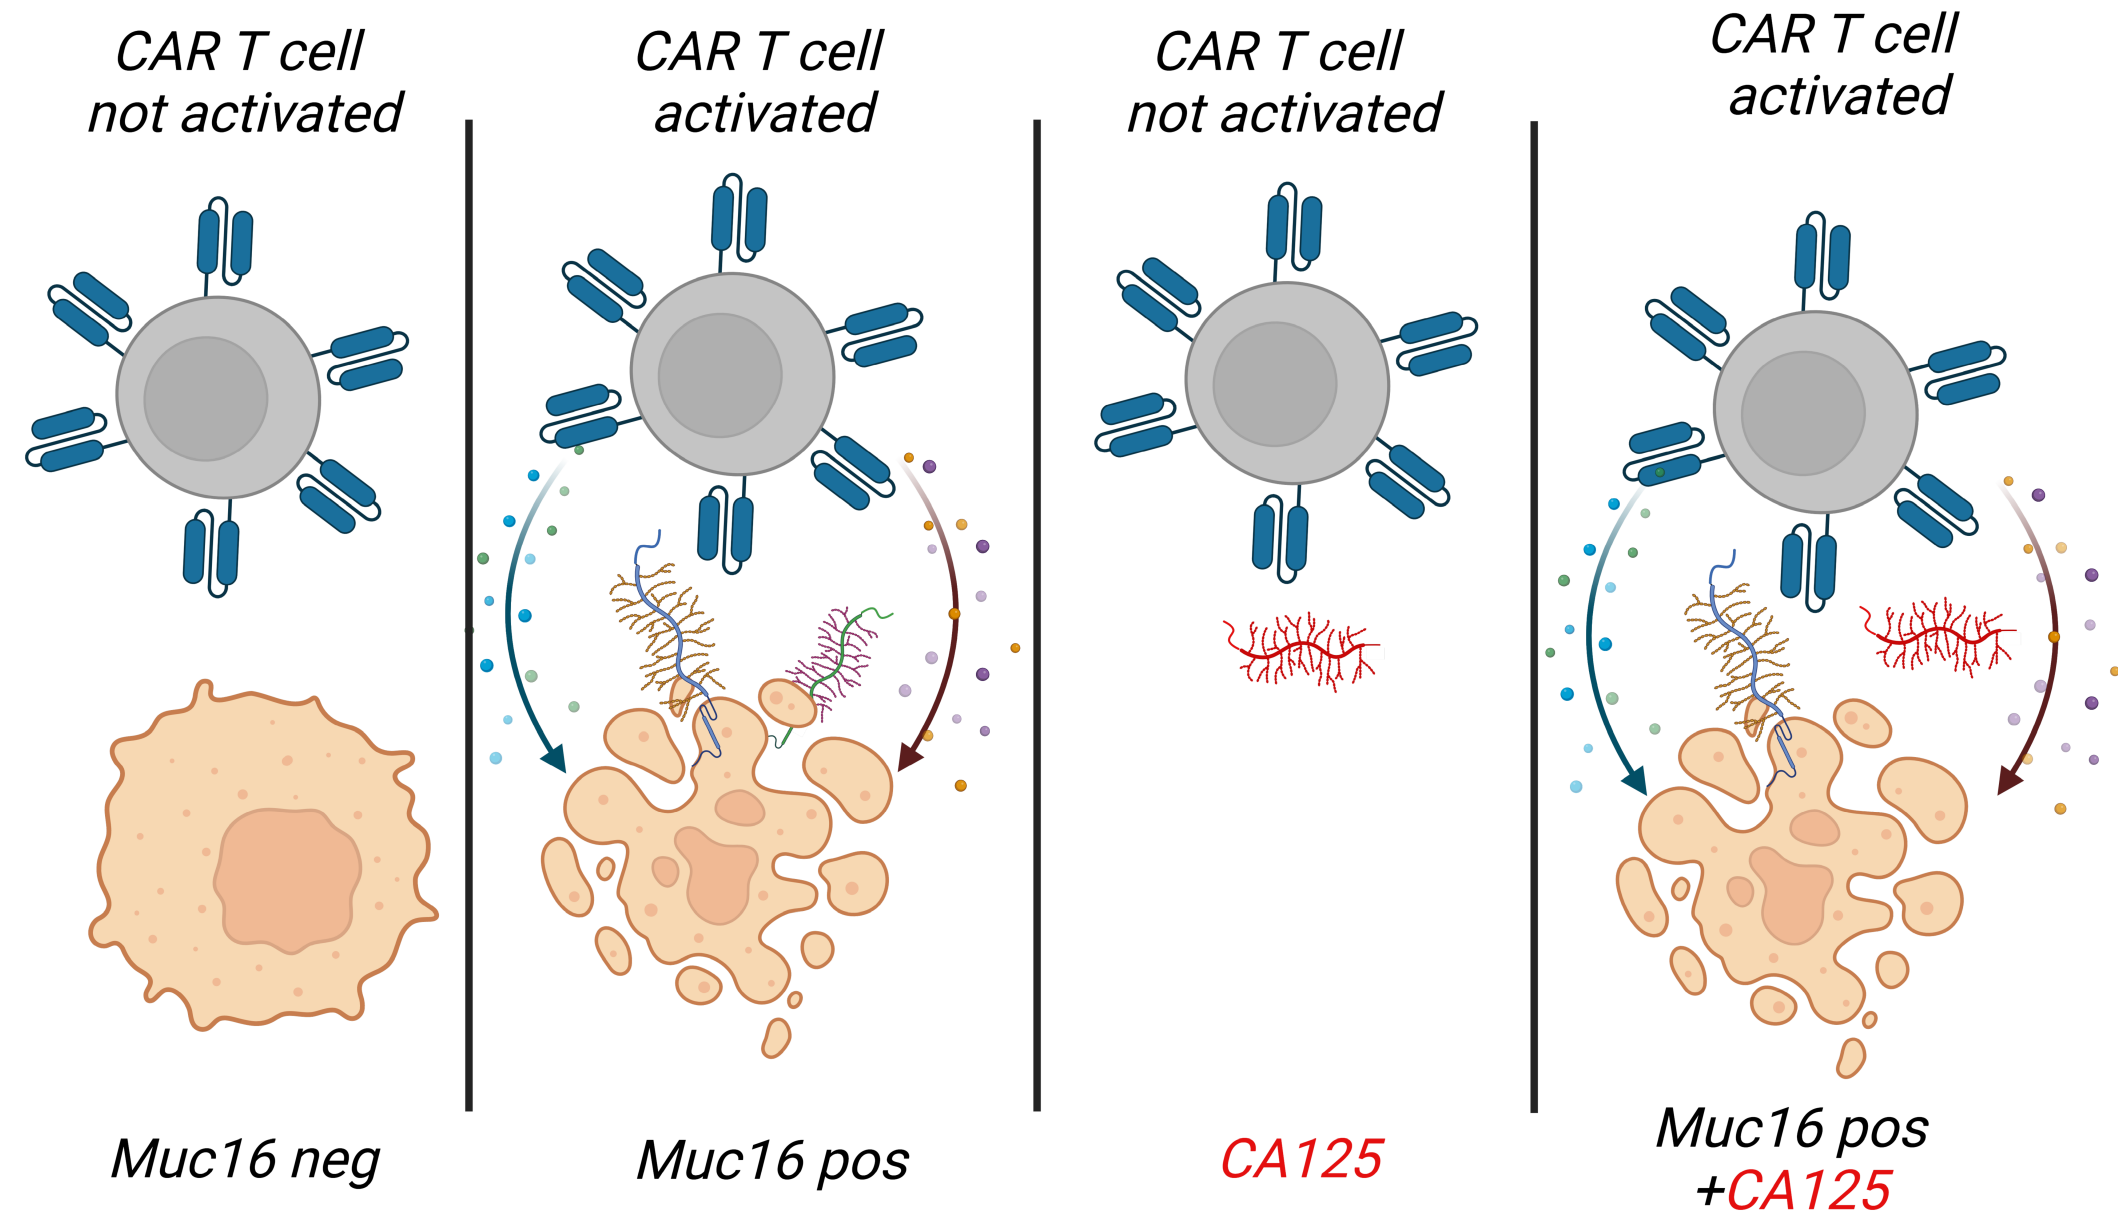

- K101 antibody derived CAR which targets the CA125 domain of MUC16 can activate T cells and trigger tumor cell killing
- Serum CA125, although recognize by K101 antibody does not activate K101CAR
- The presence of free CA125 does not shed K101CAR activity
