# Supplementary figures and images for: Efficient CAR T cell targeting of the CA125 extracellular repeat domain of MUC16
Source: PubMed Central journal article supplement — J Immunother Cancer. 2024 Apr 11;12(4):e008179. doi: 10.1136/jitc-2023-008179 (PMC11015285; doi:10.1136/jitc-2023-008179), 2024-04-11

## Supplementary Figure 2

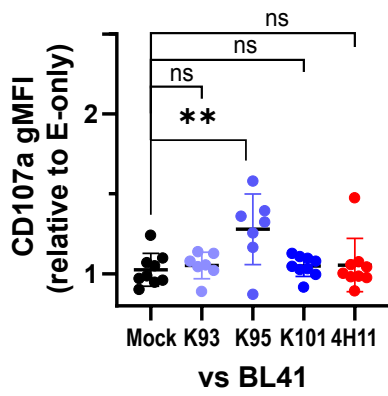

Supplement: jitc-2023-008179supp003.pdf [file jitc-2023-008179supp003.pdf]

## Supplementary Figure 3

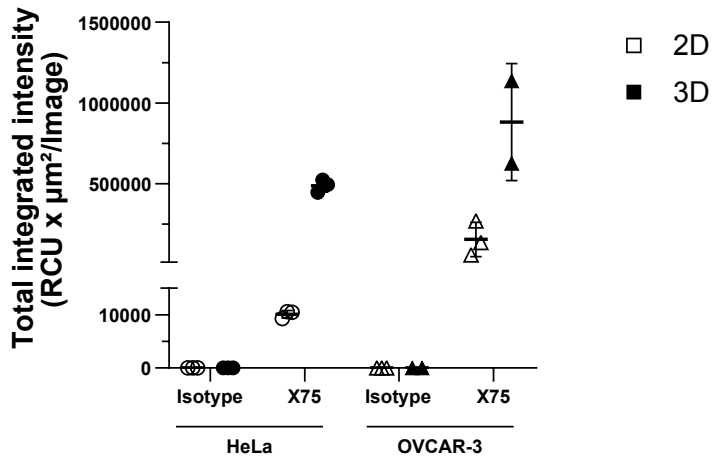

Supplement: jitc-2023-008179supp004.pdf [file jitc-2023-008179supp004.pdf]

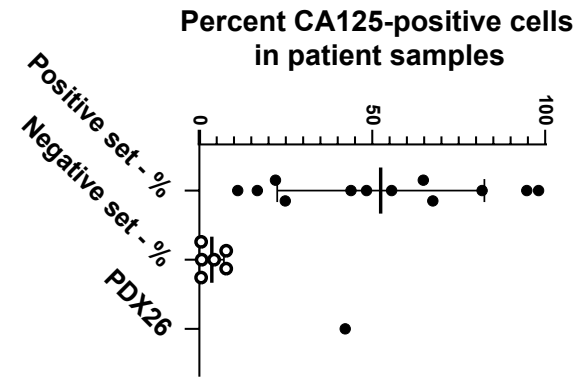

**Supplementary Figure 4**

Supplement: jitc-2023-008179supp005.pdf [file jitc-2023-008179supp005.pdf]

# Supplementary Figure 5

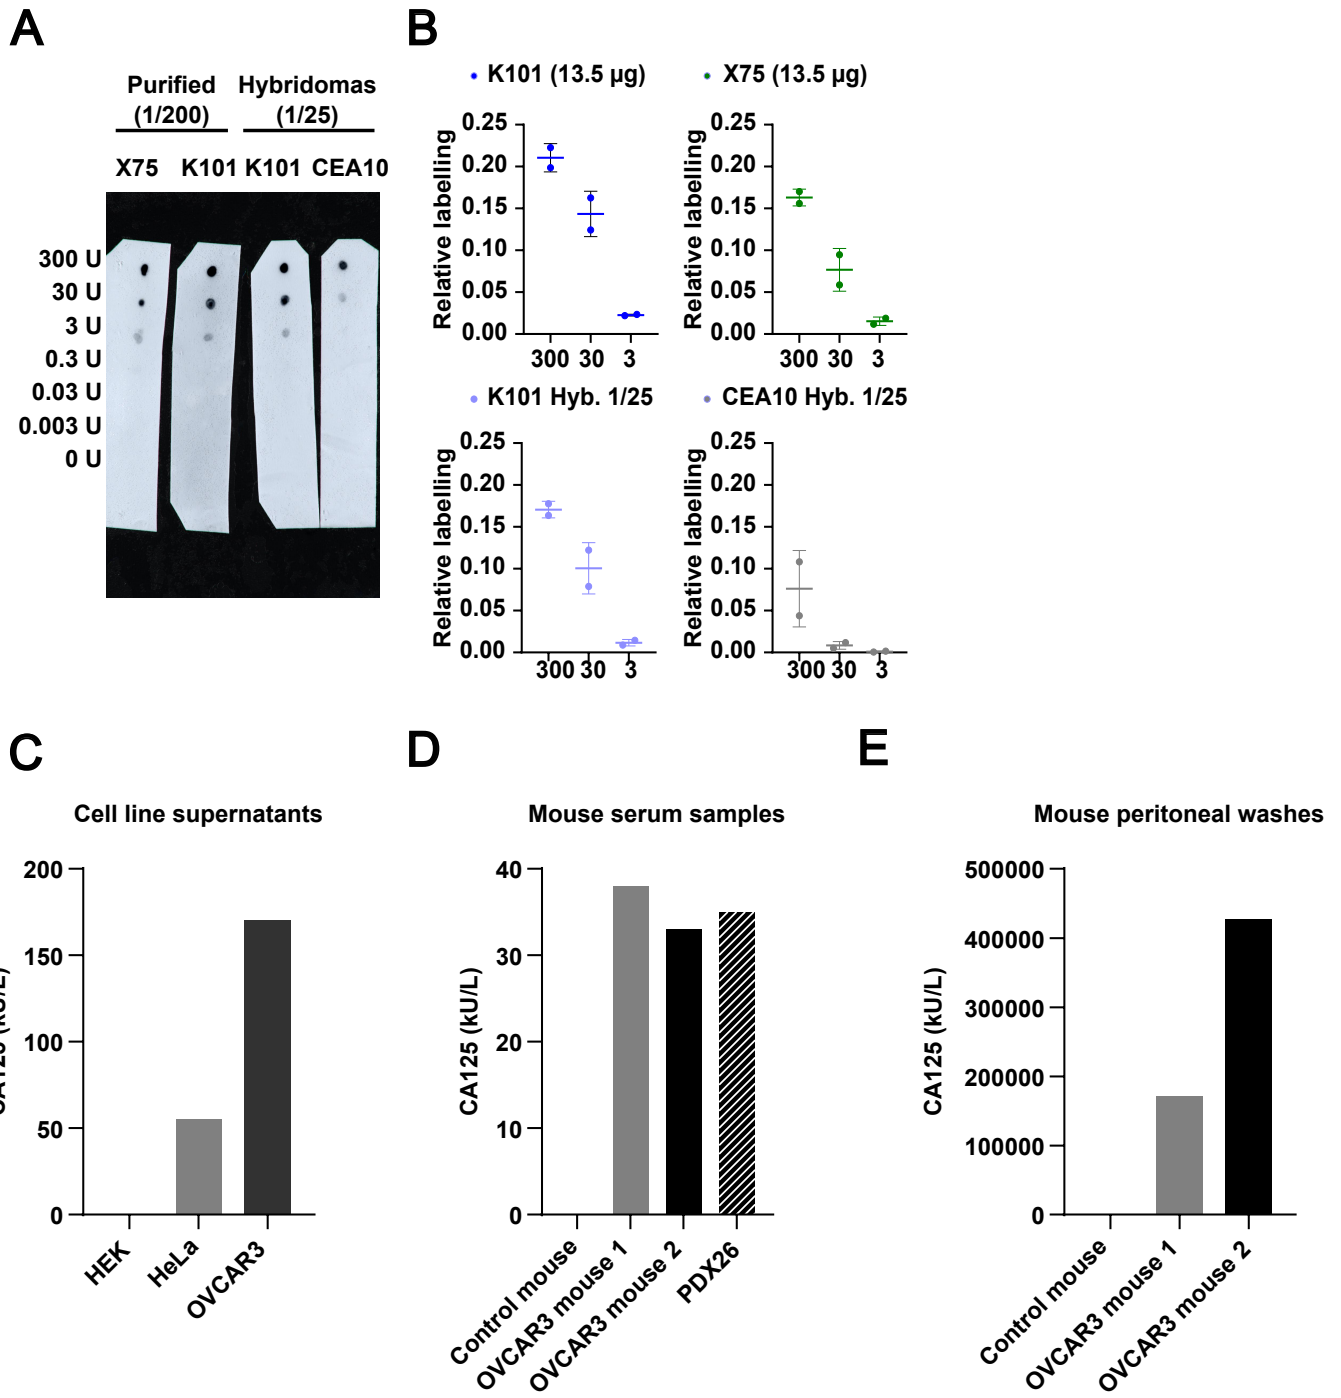

Supplement: jitc-2023-008179supp006.pdf [file jitc-2023-008179supp006.pdf]

## Supplementary Figure 6

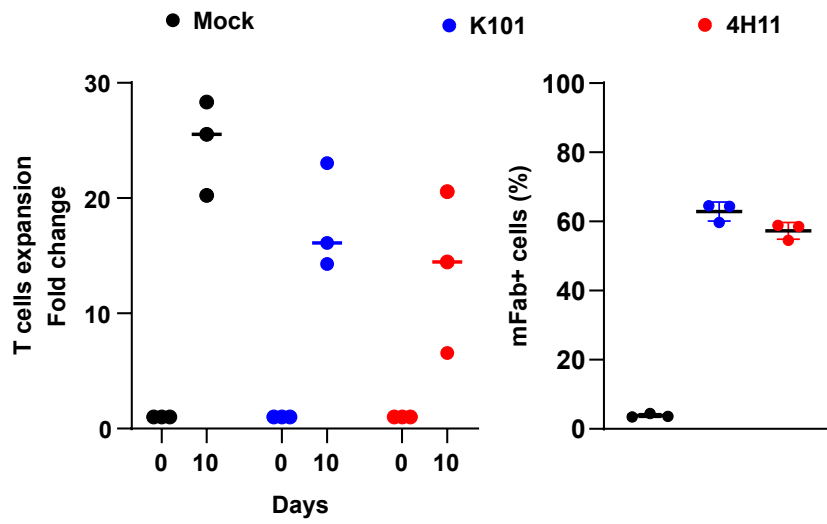

Supplement: jitc-2023-008179supp007.pdf [file jitc-2023-008179supp007.pdf]

## Supplementary Figure 7

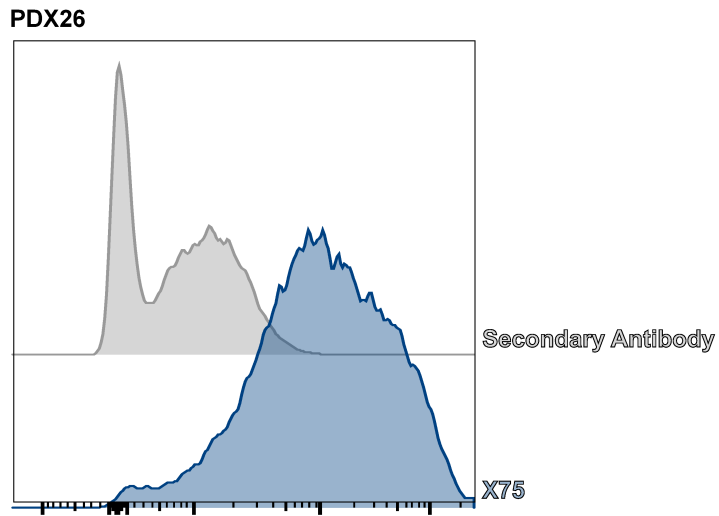

Supplement: jitc-2023-008179supp008.pdf [file jitc-2023-008179supp008.pdf]
